# Supplementary material for: African dust outbreaks over the western Mediterranean Basin: 11-year characterization of atmospheric circulation patterns and dust source areas
Source: Copernicus journal article supplement (doi:10.5194/acp-14-6759-2014), 2014-07-03
Supplement: Supplementary file 1 [file acp-14-6759-2014-supplement.zip]

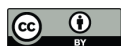

## *Supplement of*

# **African dust outbreaks over the western Mediterranean Basin: 11-year characterization of atmospheric circulation patterns and dust source areas**

**P. Salvador et al.**

*Correspondence to:* P. Salvador ([pedro.salvador@ciemat.es](mailto:pedro.salvador@ciemat.es))

- Supplement-Cover-Letter.pdf
- Supplement.PDF
- Supplementary data sets.xlsx
