# Supplementary material for: African dust outbreaks over the western Mediterranean Basin: 11-year characterization of atmospheric circulation patterns and dust source areas
Source: Copernicus journal article supplement (doi:10.5194/acp-14-6759-2014), 2014-07-03
Supplement: Supplementary file 2 [file acp-14-6759-2014-supplement.zip]

# **African dust outbreaks over the western Mediterranean basin: 11-year characterization of atmospheric circulation patterns and dust source areas**

**P. Salvador<sup>1</sup>, S. Alonso-Pérez<sup>2,3,4</sup>, J. Pey<sup>2,5</sup>, B. Artíñano<sup>1</sup>, J.J. de Bustos<sup>3</sup>, A. Alastuey<sup>2</sup>, X. Querol<sup>2</sup>**

[1]{ Environmental Department of the Research Center for Energy, Environment and Technology (CIEMAT) – Unidad Asociada en Contaminación Atmosférica CSIC-CIEMAT. Avenida Complutense 40, 28040 Madrid. Spain }

[2]{ Institute of Environmental Assessment & Water Research (IDÆA-CSIC). c/ Jordi Girona 18, 08034 Barcelona. Spain }

[3]{ Centro de Investigación Atmosférica de Izaña, Agencia Estatal de Meteorología (AEMET) c/ La Marina 20, Santa Cruz de Tenerife. 38071, Spain }

[4]{ Universidad Europea de Canarias, Laureate International Universities, C/Inocencio García, 1, 38300 La Orotava, Spain }

[5]{ Aix-Marseille Université, CNRS, LCE FRE 3416, Marseille, 13331, France }

Correspondence to: P. Salvador (pedro.salvador@ciemat.es)

## **Supplementary material**

Figure S01. Composite sea level pressure (hPa) representing circulation types leading to ADO over the western Mediterranean basin.

Figure S02. Composite 700 hPa geopotential height (m) representing circulation types leading to ADO over the western Mediterranean basin.

**Supplementary data sets.xlsx** enclosed in the Supplementary material.zip archive contains Tables S1 and S2.

1     Figure S01.

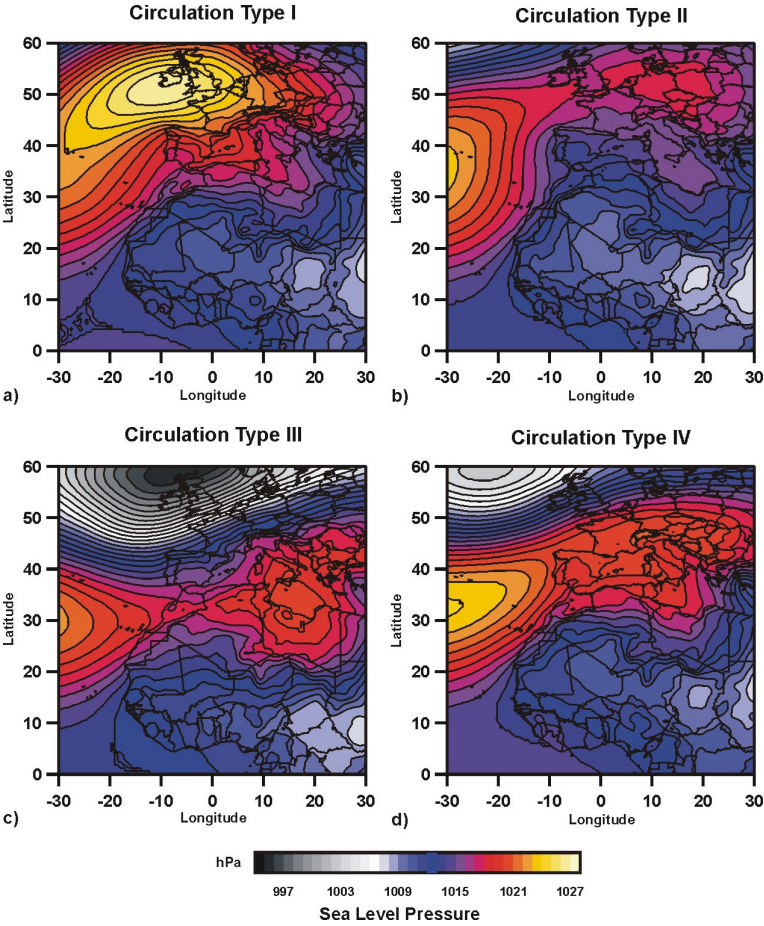

2

3

1     Figure S02.

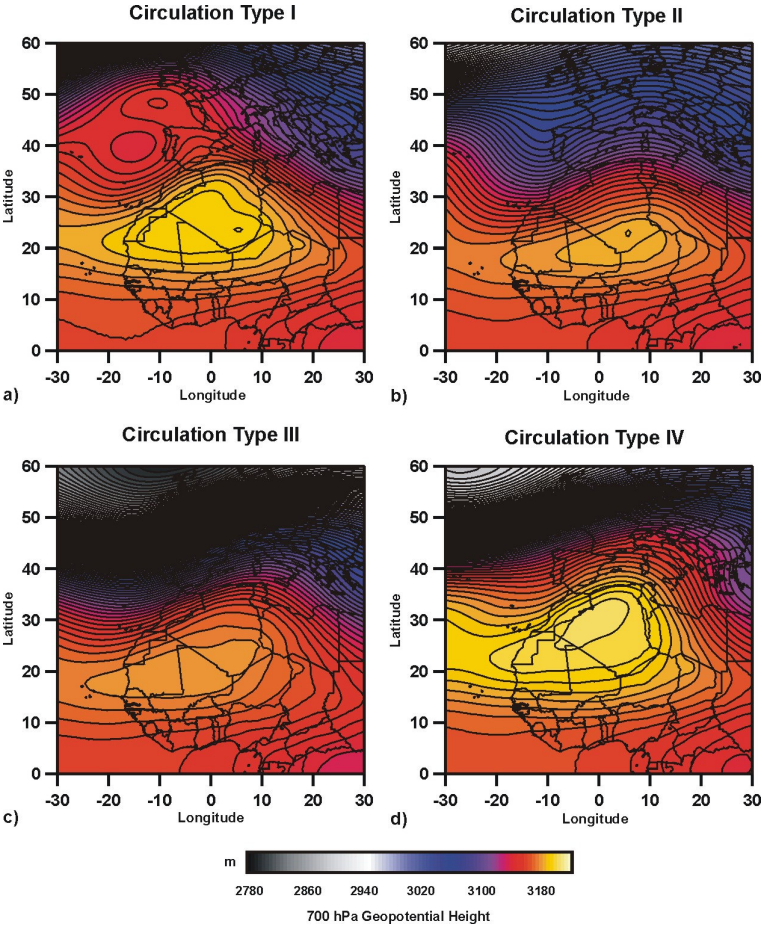

2
